# Supplementary material for: Breaking the Rebellion: Photodynamic Inactivation against Erwinia amylovora Resistant to Streptomycin
Source: MDPI journal article supplement (doi:10.3390/antibiotics11050544), 2022-04-19
Supplement: s1 [file s1]

## Supplementary

**Table S1:** PDI of *E. amylovora*<sup>SmR</sup> using B17-0024 w/o Sm in medium (n = 3)

|                                     | CFU / 100 $\mu$ L |       |          | relative inactivation [CFU <sub>control</sub> /CFU <sub>sample</sub> ] |       |          |
|-------------------------------------|-------------------|-------|----------|------------------------------------------------------------------------|-------|----------|
|                                     | mean              | $\pm$ | SD       | mean                                                                   | $\pm$ | SD       |
| Control -/- (30 min)                | 4.57E+07          | $\pm$ | 1.15E+07 | 1.00E+00                                                               | $\pm$ | 0.00E+00 |
| Dark control, 100 $\mu$ M (30 min)  | 5.11E+07          | $\pm$ | 1.61E+07 | 9.23E-01                                                               | $\pm$ | 1.99E-01 |
| Light control (30 min)              | 5.15E+07          | $\pm$ | 2.06E+07 | 1.01E+00                                                               | $\pm$ | 5.93E-01 |
| PDI, B17-0024, 1 $\mu$ M (5 min)    | 6.80E+07          | $\pm$ | 1.08E+07 | 6.76E-01                                                               | $\pm$ | 1.74E-01 |
| PDI, B17-0024, 10 $\mu$ M (5 min)   | 4.28E+07          | $\pm$ | 2.35E+07 | 1.25E+00                                                               | $\pm$ | 6.23E-01 |
| PDI, B17-0024, 100 $\mu$ M (5 min)  | 3.32E+03          | $\pm$ | 3.02E+03 | 2.44E+05                                                               | $\pm$ | 4.03E+05 |
| PDI, B17-0024, 1 $\mu$ M (30 min)   | 5.46E+07          | $\pm$ | 9.04E+06 | 8.52E-01                                                               | $\pm$ | 2.70E-01 |
| PDI, B17-0024, 10 $\mu$ M (30 min)  | 1.67E+07          | $\pm$ | 1.42E+07 | 8.08E+00                                                               | $\pm$ | 1.00E+01 |
| PDI, B17-0024, 100 $\mu$ M (30 min) | 5.53E+01          | $\pm$ | 4.71E+01 | 1.17E+07                                                               | $\pm$ | 1.93E+07 |

**Table S2:** PDI of *E. amylovora*<sup>SmR</sup> using B17-0024 with 100  $\mu$ g/ml Sm (n = 3)

|                                     | CFU / 100 $\mu$ L |       |          | relative inactivation [CFU <sub>control</sub> /CFU <sub>sample</sub> ] |       |          |
|-------------------------------------|-------------------|-------|----------|------------------------------------------------------------------------|-------|----------|
|                                     | mean              | $\pm$ | SD       | mean                                                                   | $\pm$ | SD       |
| Control -/- (30 min)                | 7.11E+07          | $\pm$ | 3.11E+07 | 1.00E+00                                                               | $\pm$ | 0.00E+00 |
| Dark control, 100 $\mu$ M (30 min)  | 1.13E+08          | $\pm$ | 1.95E+07 | 6.61E-01                                                               | $\pm$ | 3.91E-01 |
| Light control (30 min)              | 8.07E+07          | $\pm$ | 3.75E+07 | 9.42E-01                                                               | $\pm$ | 3.13E-01 |
| PDI, B17-0024, 1 $\mu$ M (5 min)    | 8.33E+07          | $\pm$ | 4.56E+07 | 9.71E-01                                                               | $\pm$ | 3.77E-01 |
| PDI, B17-0024, 10 $\mu$ M (5 min)   | 4.93E+07          | $\pm$ | 1.62E+07 | 1.56E+00                                                               | $\pm$ | 9.58E-01 |
| PDI, B17-0024, 100 $\mu$ M (5 min)  | 1.63E+01          | $\pm$ | 9.71E+00 | 5.79E+06                                                               | $\pm$ | 3.69E+06 |
| PDI, B17-0024, 1 $\mu$ M (30 min)   | 6.97E+07          | $\pm$ | 3.70E+07 | 1.15E+00                                                               | $\pm$ | 4.09E-01 |
| PDI, B17-0024, 10 $\mu$ M (30 min)  | 3.56E+06          | $\pm$ | 1.74E+06 | 2.14E+01                                                               | $\pm$ | 5.93E+00 |
| PDI, B17-0024, 100 $\mu$ M (30 min) | 3.38E+02          | $\pm$ | 5.82E+02 | 3.82E+07                                                               | $\pm$ | 5.72E+07 |

**Table S3:** PDI of *E. amylovora*<sup>SmR</sup> based on Chl supplemented with 1.2% PASA w/o Sm in medium (n = 3)

|                                                     | CFU / 100 $\mu$ L |       |          | relative inactivation [CFU <sub>control</sub> /CFU <sub>sample</sub> ] |       |          |
|-----------------------------------------------------|-------------------|-------|----------|------------------------------------------------------------------------|-------|----------|
|                                                     | mean              | $\pm$ | SD       | mean                                                                   | $\pm$ | SD       |
| Control -/-                                         | 7.96E+07          | $\pm$ | 2.68E+07 | 1.00E+00                                                               | $\pm$ | 0.00E+00 |
| Dark control, 100 $\mu$ M Chl + 1.2 % PASA (30 min) | 2.23E+06          | $\pm$ | 7.58E+05 | 3.62E+01                                                               | $\pm$ | 7.13E+00 |
| Light control, 1.2 % PASA (30 min)                  | 7.23E+05          | $\pm$ | 7.72E+05 | 2.76E+02                                                               | $\pm$ | 2.91E+02 |
| PDI, 1 $\mu$ M Chl + 1.2 % PASA (5 min)             | 8.41E+05          | $\pm$ | 1.20E+06 | 9.04E+02                                                               | $\pm$ | 1.35E+03 |
| PDI, 10 $\mu$ M Chl + 1.2 % PASA (5 min)            | 1.34E+05          | $\pm$ | 9.77E+04 | 1.41E+03                                                               | $\pm$ | 1.67E+03 |
| PDI, 100 $\mu$ M Chl + 1.2 % PASA (5 min)           | 1.45E+03          | $\pm$ | 1.92E+03 | 7.98E+05                                                               | $\pm$ | 1.28E+06 |
| PDI, 1 $\mu$ M Chl + 1.2 % PASA (30 min)            | 7.32E+05          | $\pm$ | 4.05E+05 | 1.17E+02                                                               | $\pm$ | 2.77E+01 |
| PDI, 10 $\mu$ M Chl + 1.2 % PASA (30 min)           | 2.95E+05          | $\pm$ | 2.14E+05 | 4.50E+02                                                               | $\pm$ | 3.77E+02 |
| PDI, 100 $\mu$ M Chl + 1.2 % PASA (30 min)          | 1.65E+02          | $\pm$ | 1.51E+02 | 3.76E+05                                                               | $\pm$ | 2.63E+05 |

**Table S4:** PDI of *E. amylovora*<sup>SmR</sup> based on Chl supplemented with 1.2% PASA and 100 µg/ml Sm (n = 3)

|                                                | CFU / 100 µL |   |          | relative inactivation [CFU <sub>control</sub> /CFU <sub>sample</sub> ] |   |          |
|------------------------------------------------|--------------|---|----------|------------------------------------------------------------------------|---|----------|
|                                                | mean         | ± | SD       | mean                                                                   | ± | SD       |
| Control -/-                                    | 1.13E+08     | ± | 1.27E+07 | 1.00E+00                                                               | ± | 0.00E+00 |
| Dark control, 100 µM Chl + 1.2 % PASA (30 min) | 1.25E+07     | ± | 1.81E+07 | 4.20E+01                                                               | ± | 4.31E+01 |
| Light control, 1.2 % PASA (30 min)             | 9.38E+06     | ± | 8.26E+06 | 1.86E+02                                                               | ± | 3.09E+02 |
| PDI, 1 µM Chl + 1.2 % PASA (5 min)             | 2.43E+06     | ± | 4.13E+06 | 2.14E+03                                                               | ± | 2.12E+03 |
| PDI, 10 µM Chl + 1.2 % PASA (5 min)            | 1.07E+06     | ± | 1.83E+06 | 1.87E+04                                                               | ± | 2.54E+04 |
| PDI, 100 µM Chl + 1.2 % PASA (5 min)           | 2.67E+05     | ± | 4.62E+05 | 2.35E+05                                                               | ± | 2.18E+05 |
| PDI, 1 µM Chl + 1.2 % PASA (30 min)            | 1.91E+06     | ± | 2.76E+06 | 2.56E+02                                                               | ± | 2.06E+02 |
| PDI, 10 µM Chl + 1.2 % PASA (30 min)           | 4.16E+06     | ± | 7.08E+06 | 1.15E+03                                                               | ± | 1.12E+03 |
| PDI, 100 µM Chl + 1.2 % PASA (30 min)          | 6.04E+04     | ± | 1.04E+05 | 1.01E+06                                                               | ± | 1.27E+06 |

**Abbreviations:** *CFU*, Colony forming unit(s); *Chl*, Sodium magnesium chlorophyllin (Na-Chlorophyllin); *DPBS*, Dulbecco's modified phosphate buffered saline; *E. amylovora*<sup>SmR</sup>, Streptomycin resistant strain of *Erwinia amylovora*; *E. amylovora*<sup>WT</sup>, Susceptible strain of *Erwinia amylovora* (type strain, DSM 30165); *MIC*, Minimum inhibitory concentration; *mean*, Mean value; *MPM*, Nutrient medium with meat extract and peptone; *Na<sub>2</sub>EDTA*, Ethylenediaminetetraacetic acid disodium salt dihydrate; *o/n*, Overnight; *PASA*, Polyaspartic acid; *PDI*, Photodynamic Inactivation of microorganisms; *PS*, Photosensitizer; *RCF*, Relative centrifugal force; *ROS*, Reactive oxygen species; *RPM*, Revolutions per minute of rotor; *SD*, Standard deviation; *Sm*, Streptomycin sulfate salt; *w/o*, Without
